# Supplementary material for: Possibility of a non-amino acid pathway in the biosynthesis of marine-derived oxazoles
Source: Royal Society of Chemistry journal article supplement (doi:10.1039/b517149k), 2006-01-01

## Supplementary information

# Possibility of a non-amino acid pathway in the biosynthesis of marine-derived oxazoles

Takao Ichino,<sup>a</sup> Hirokazu Arimoto<sup>\*b</sup> and Daisuke Uemura<sup>\*a</sup>

<sup>a</sup>Department of Chemistry, Graduate School of Science, and Institute for Advanced Research, Nagoya University, Chikusa, Nagoya 464-8602, Japan. Fax:+81-52-789-5041; Tel:+81-52-789-3654; E-mail:uemura@chem3.chem.nagoya-u.ac.jp, <sup>b</sup>Graduate School of Life Sciences, Tohoku University, Tsutsumidori-Amamiyamachi, Aoba, Sendai 981-8555, Japan. Fax:+81-22-717-8806; Tel:+81-22-717-8803; E-mail:arimoto@biochem.tohoku.ac.jp

## General Remarks

<sup>1</sup>H and <sup>13</sup>C NMR spectra were recorded on a JEOL JNM-EX270 or a JEOL JNM-A400 spectrometer with CDCl<sub>3</sub> as a solvent.

## General synthetic procedures for oxazoles

### 1) 2-dimethoxymethyl-cyclododecanone **1**:

To a solution of cyclododecanone (5.00g, 27.4 mmol) and trimethylorthoformate (6.00 mL, 54.8 mmol) in dichloromethane (28 mL) was added slowly BF<sub>3</sub> etherate (7.00 mL, 55.2 mmol) at -78°C. The solution was stirred for 30 min. *N,N*-diisopropyl ethylamine (14.3 mL, 82.1 mmol) was added, and the reaction mixture was further stirred for 90 min at the same temperature. The reaction was quenched by addition of sat. NH<sub>4</sub>Cl aq. (50 mL), and the resulting mixture was extracted with dichloromethane. The extract was washed with brine, dried, and concentrated to dryness. Chromatography of the residue (silicagel, hexane-ether) gave 2-dimethoxymethyl-cyclododecanone **1** (7.03 g, quant.) as a pale yellow oil.

### 2) Oxime formation and subsequent Beckmann rearrangement to oxazole **3** (Method A)

A solution of **1** (130 mg, 507 μmol) and HONH<sub>2</sub>·HCl (70 mg, 1.01 mmol) in pyridine (1.0 mL, 12.4 mmol) was stirred at 50°C for 8 hr. The reaction mixture was diluted with ether (20 mL), and washed with the sat. NH<sub>4</sub>Cl aq. (50 mL). The organic phase was

washed with brine, dried, and concentrated to dryness. Chromatography of the residue (silicagel, hexane-ether) gave ketoxime **2** (112 mg, 81%) as a pale yellow solid.

A solution of ketoxime **2** (32.8 mg, 121  $\mu\text{mol}$ ) and polyphosphoric acid (100 mg) in toluene (3 mL) was heated under reflux conditions for 8 hr. The reaction was quenched by addition of sat.  $\text{NaHCO}_3\text{aq.}$  (10 mL), and the resulting mixture was extracted with ether (20 mL). The organic phase was washed with brine, dried, and concentrated to dryness. Chromatography of the residue (silicagel, hexane-ether) gave oxazole **3** (25.1 mg, quant.) as a pale yellow solid.

### 3) One-pot oxazole formation from ketone **1** (Method B)

A solution of 2-dimethoxymethyl-cyclododecanone (**1**, 100 mg, 390  $\mu\text{mol}$ ) and  $\text{HONH}_2 \cdot \text{HCl}$  (54.0 mg, 777  $\mu\text{mol}$ ) in toluene (2 mL) was heated under reflux conditions for 24 hr. Polyphosphoric acid (100 mg) was then added to the reaction mixture, and stirred further at the same temperature for 4 hr. The reaction was quenched by addition of sat.  $\text{NaHCO}_3\text{aq.}$  (5 mL), and the resulting mixture was extracted with ether (5 mL). The organic phase was washed with brine, dried, and concentrated to dryness. Chromatography of the residue (silicagel, hexane-ether) gave oxazole **3** (37.1 mg, 46%) as a pale yellow solid.

400 MHz

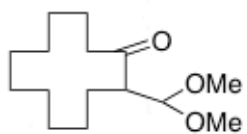

**1**

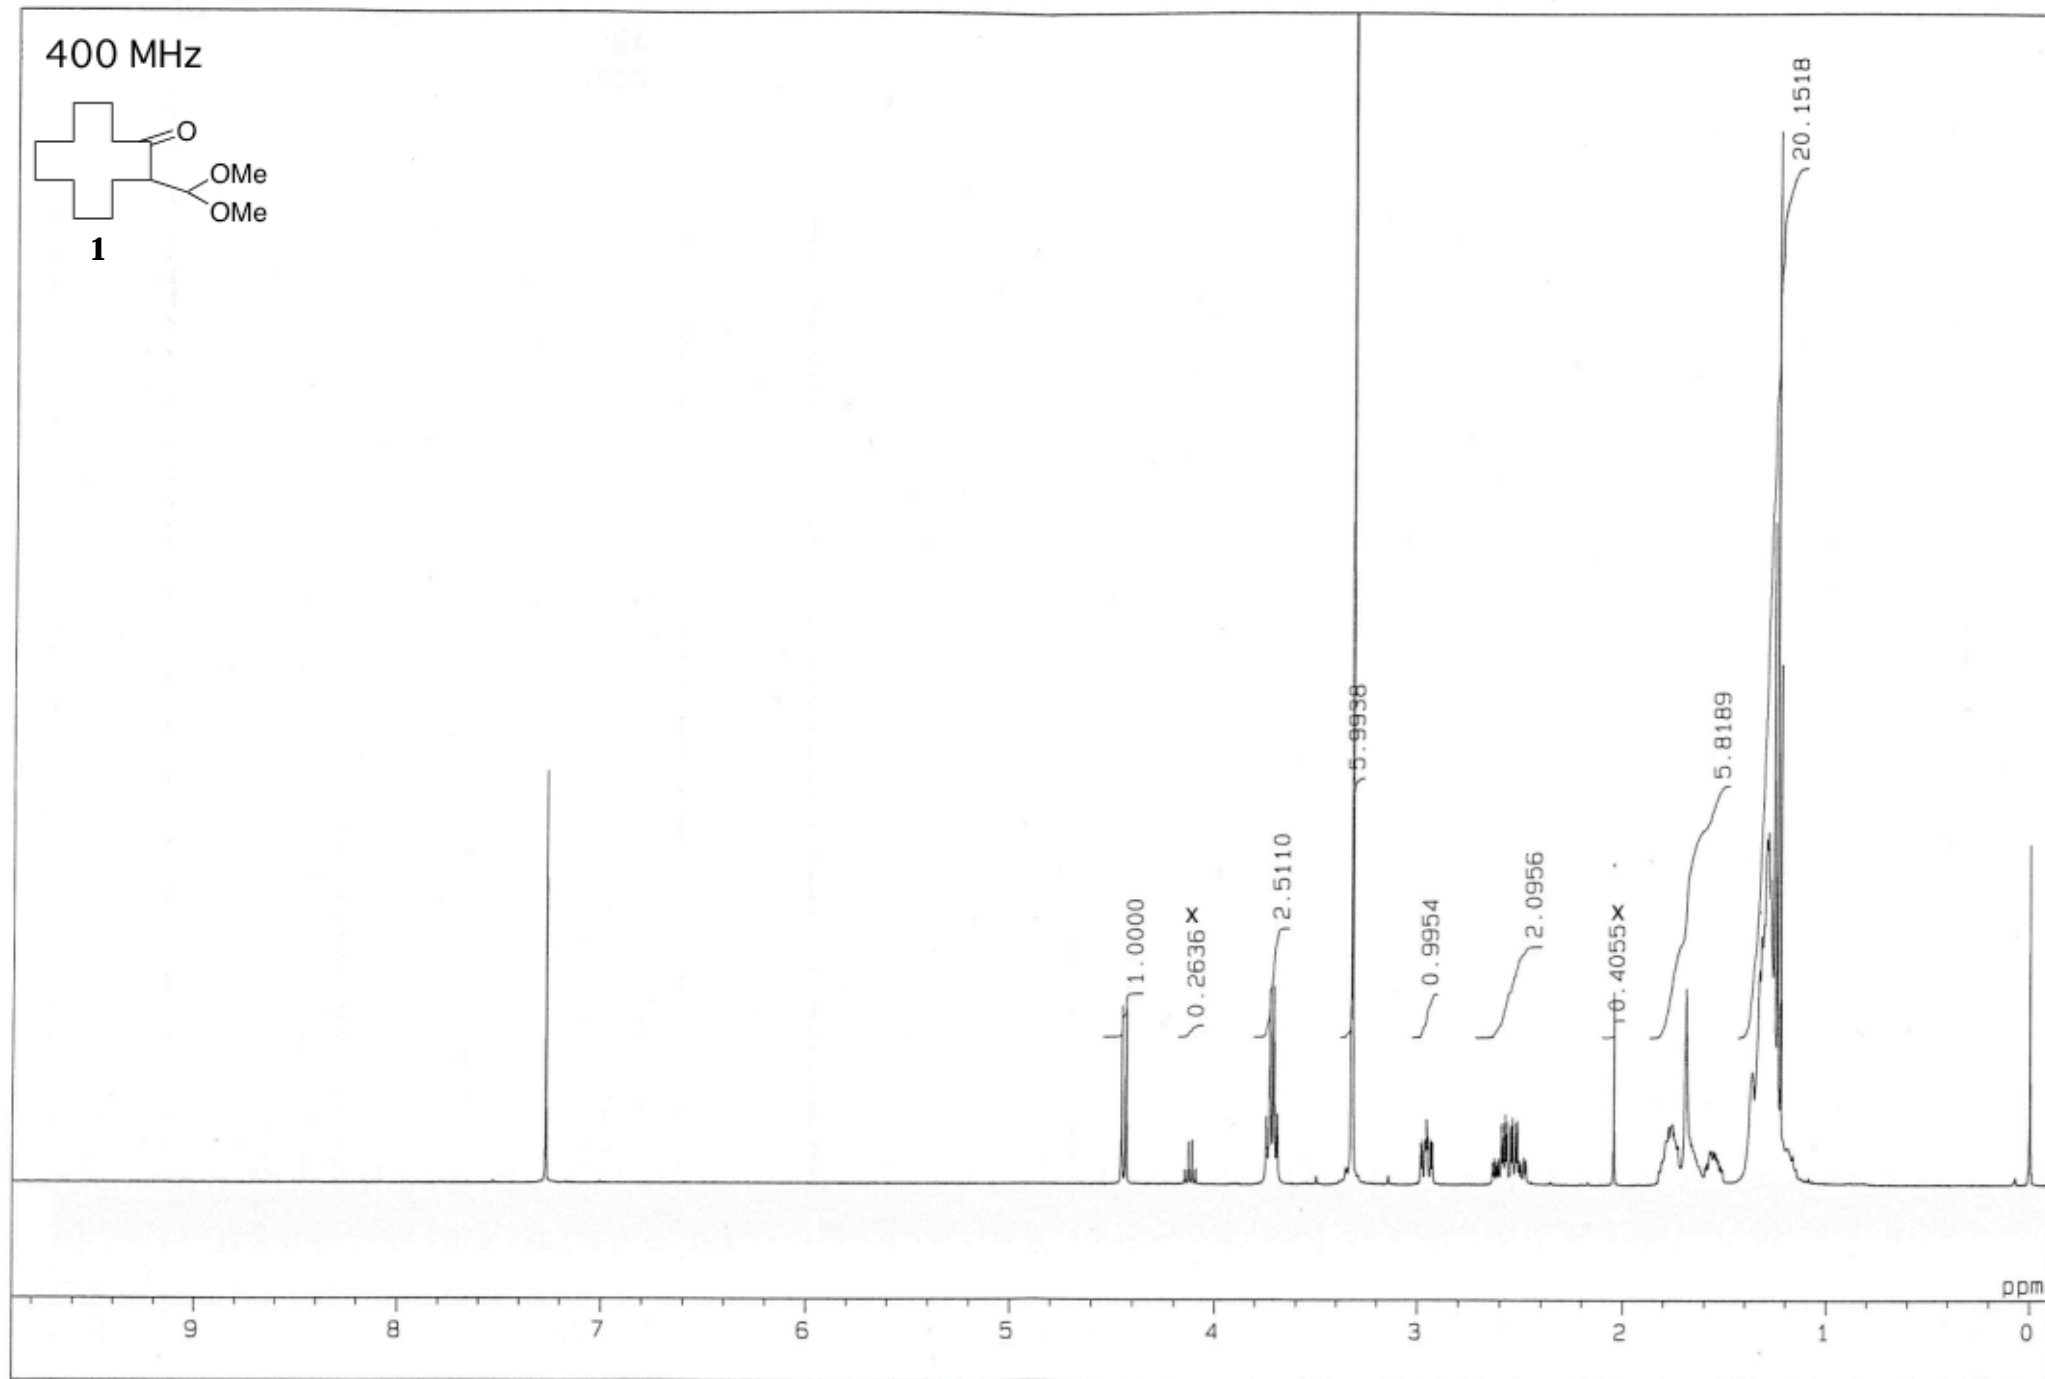

400 MHz

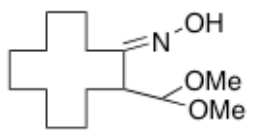

2

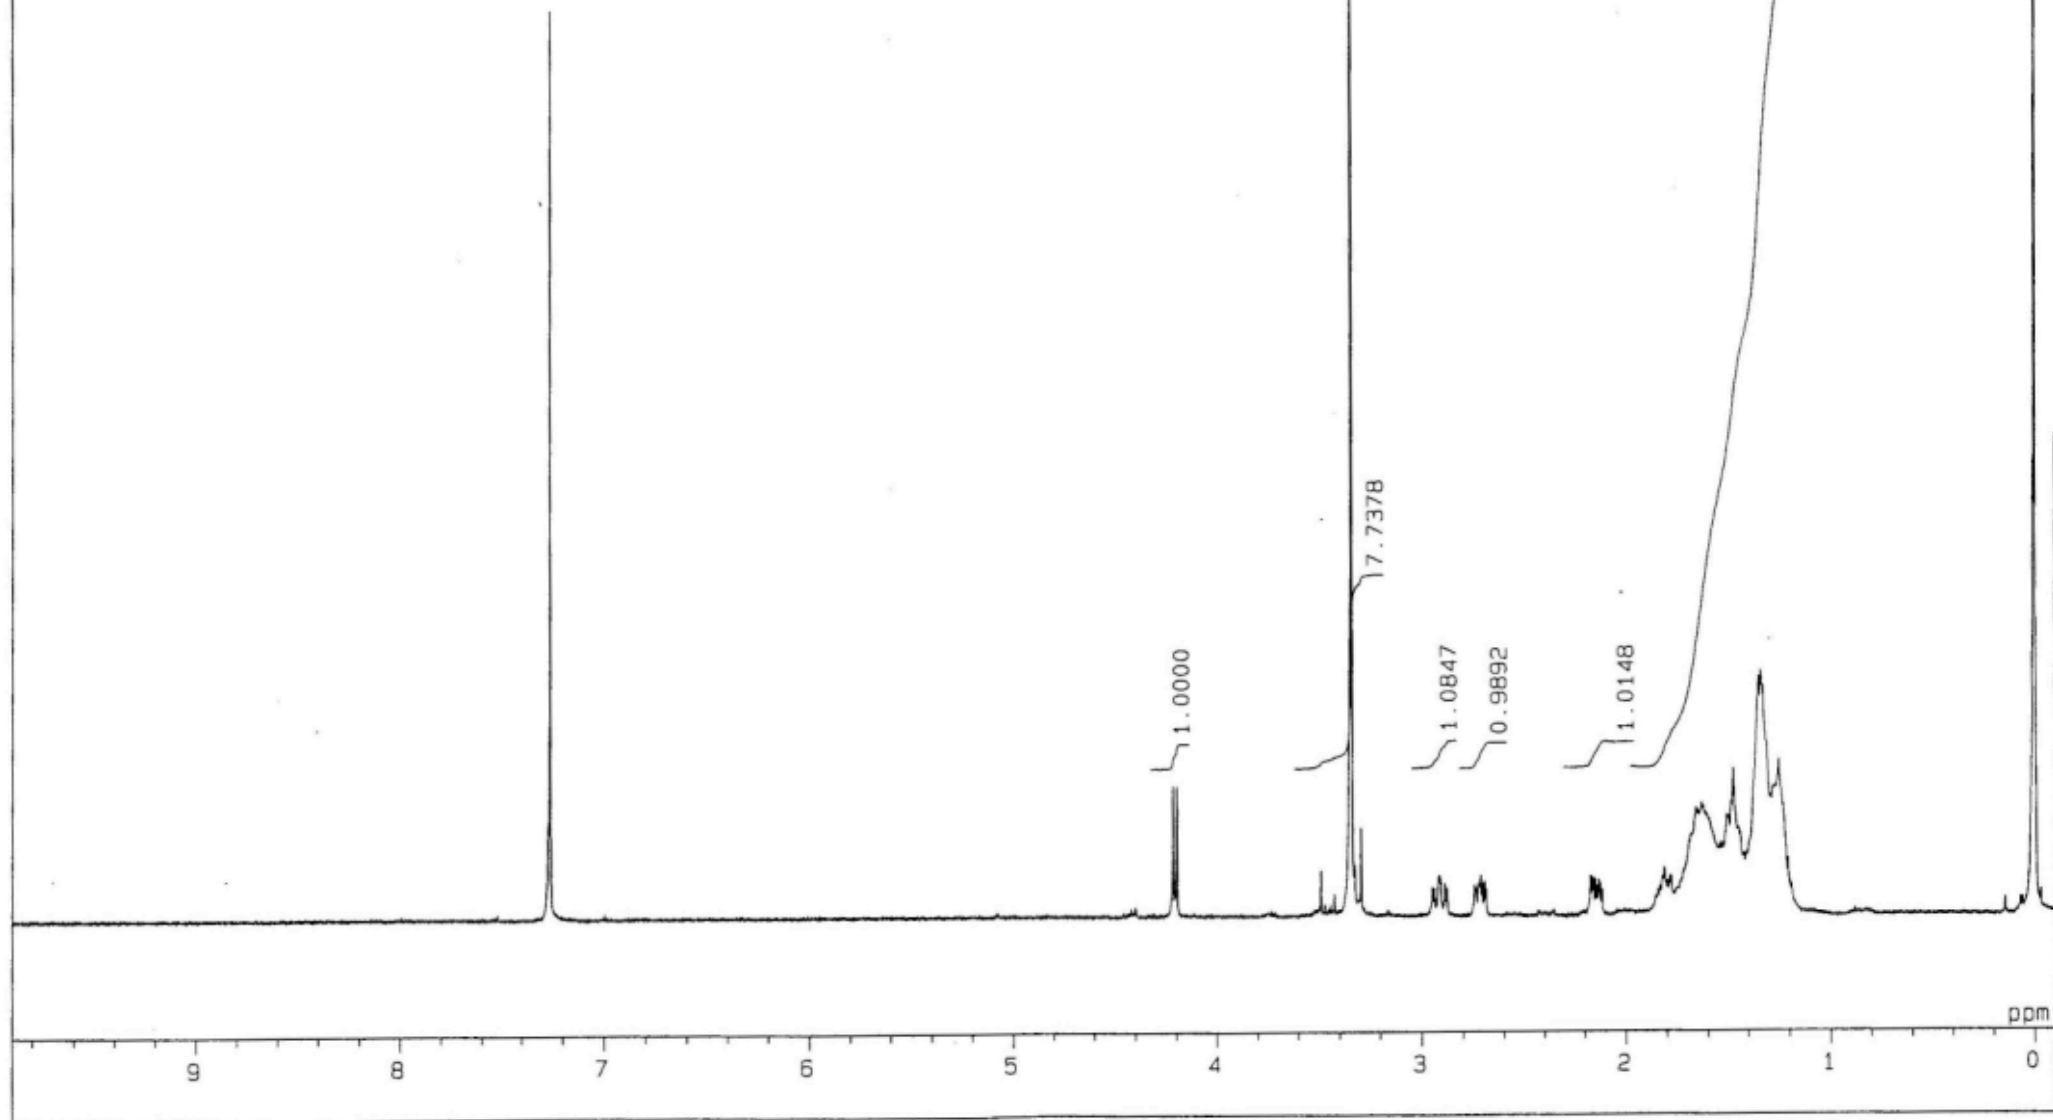

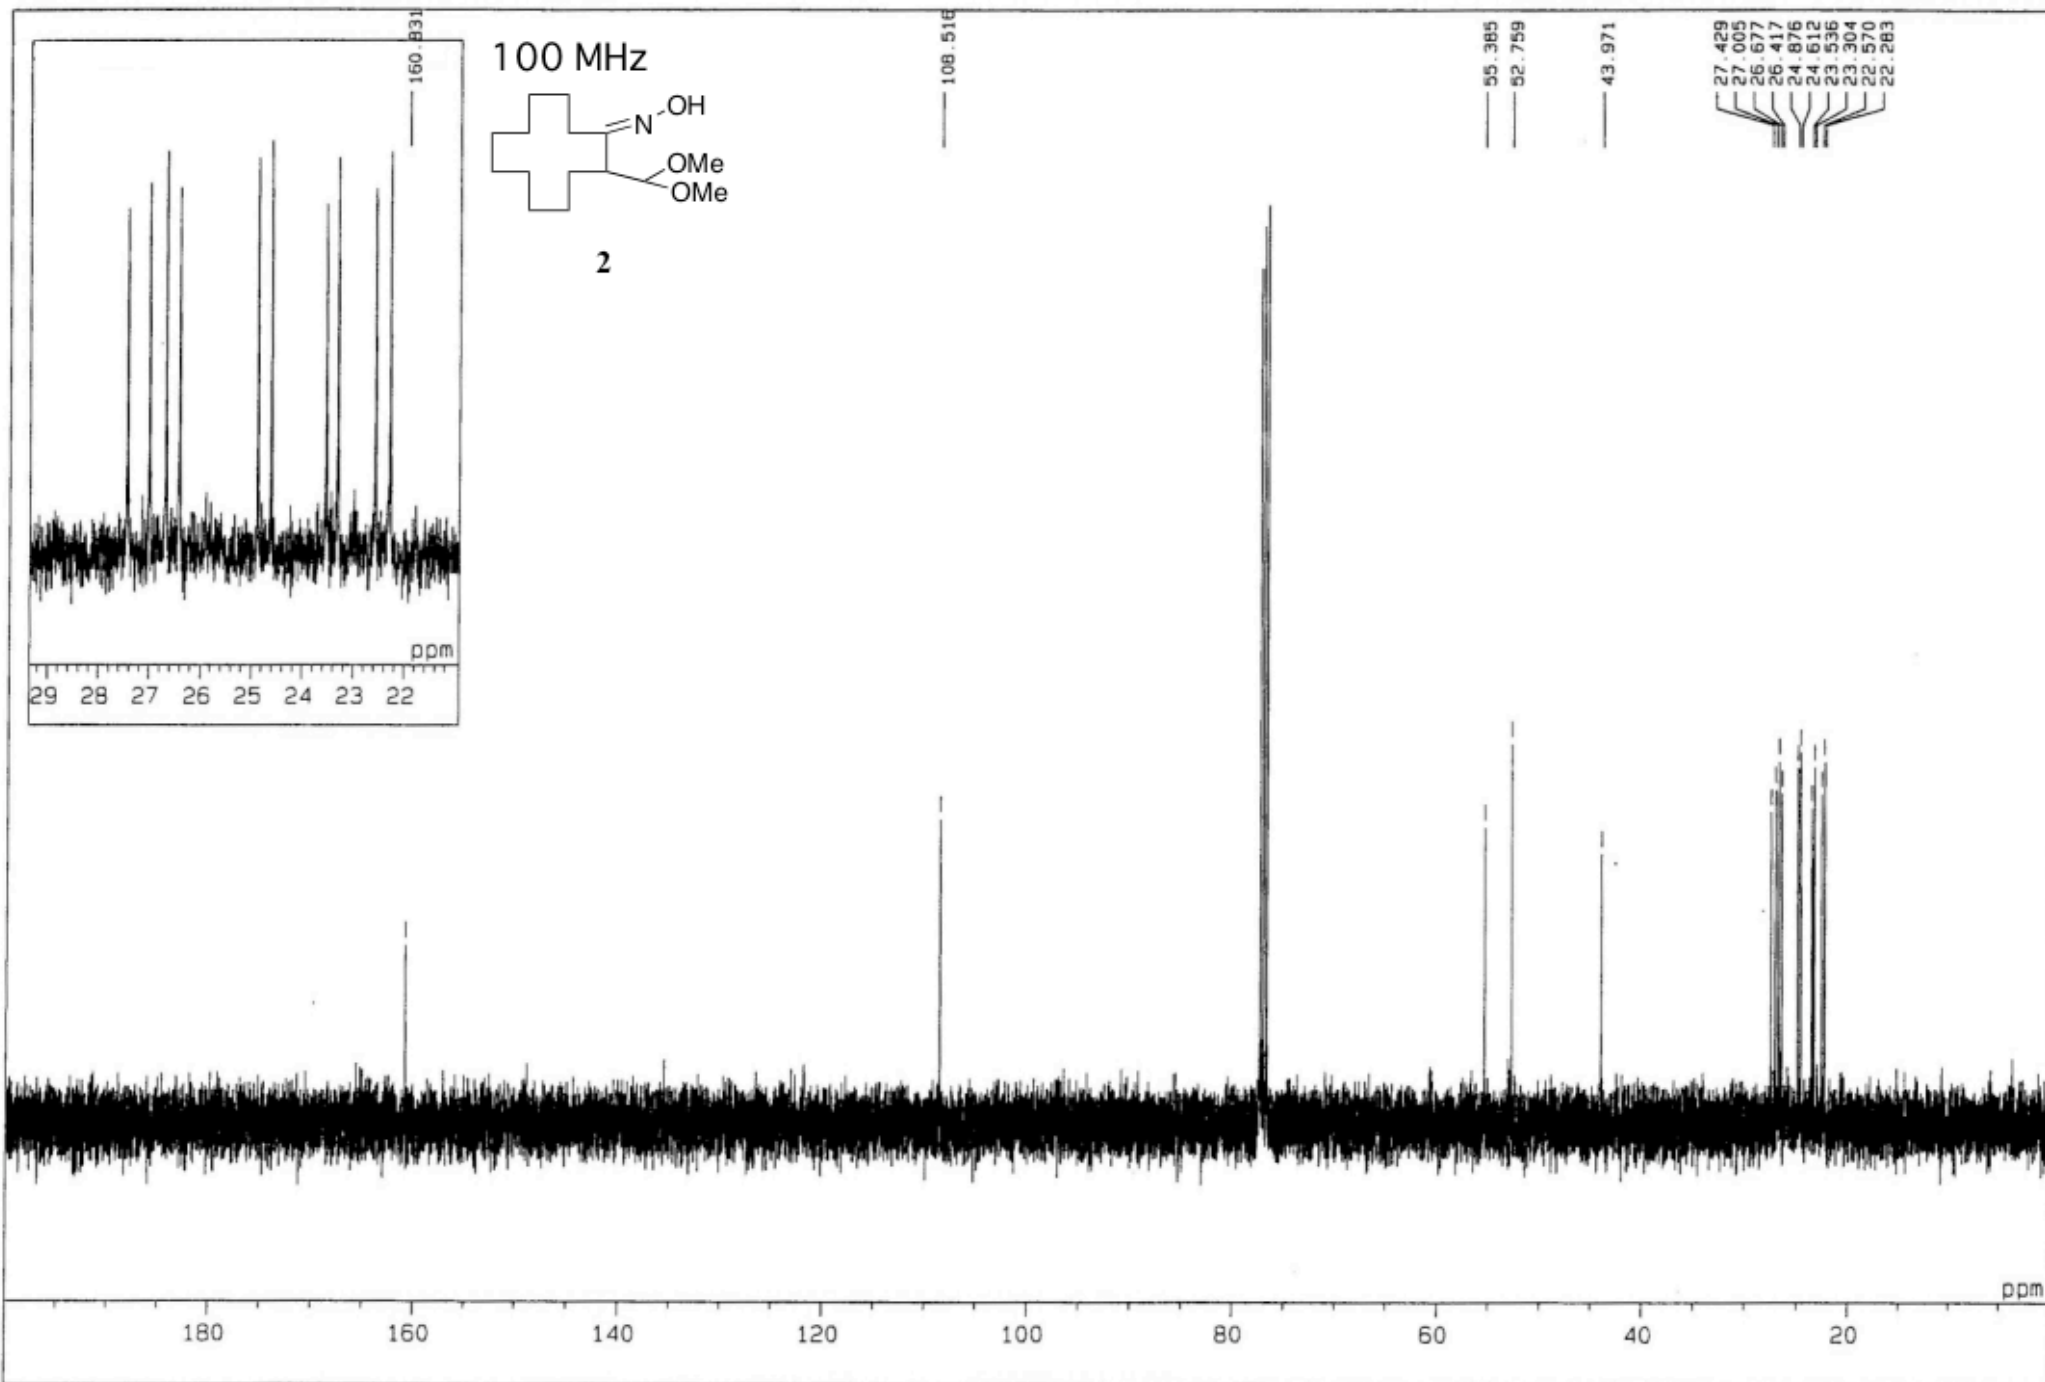

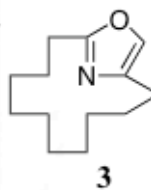

400 MHz

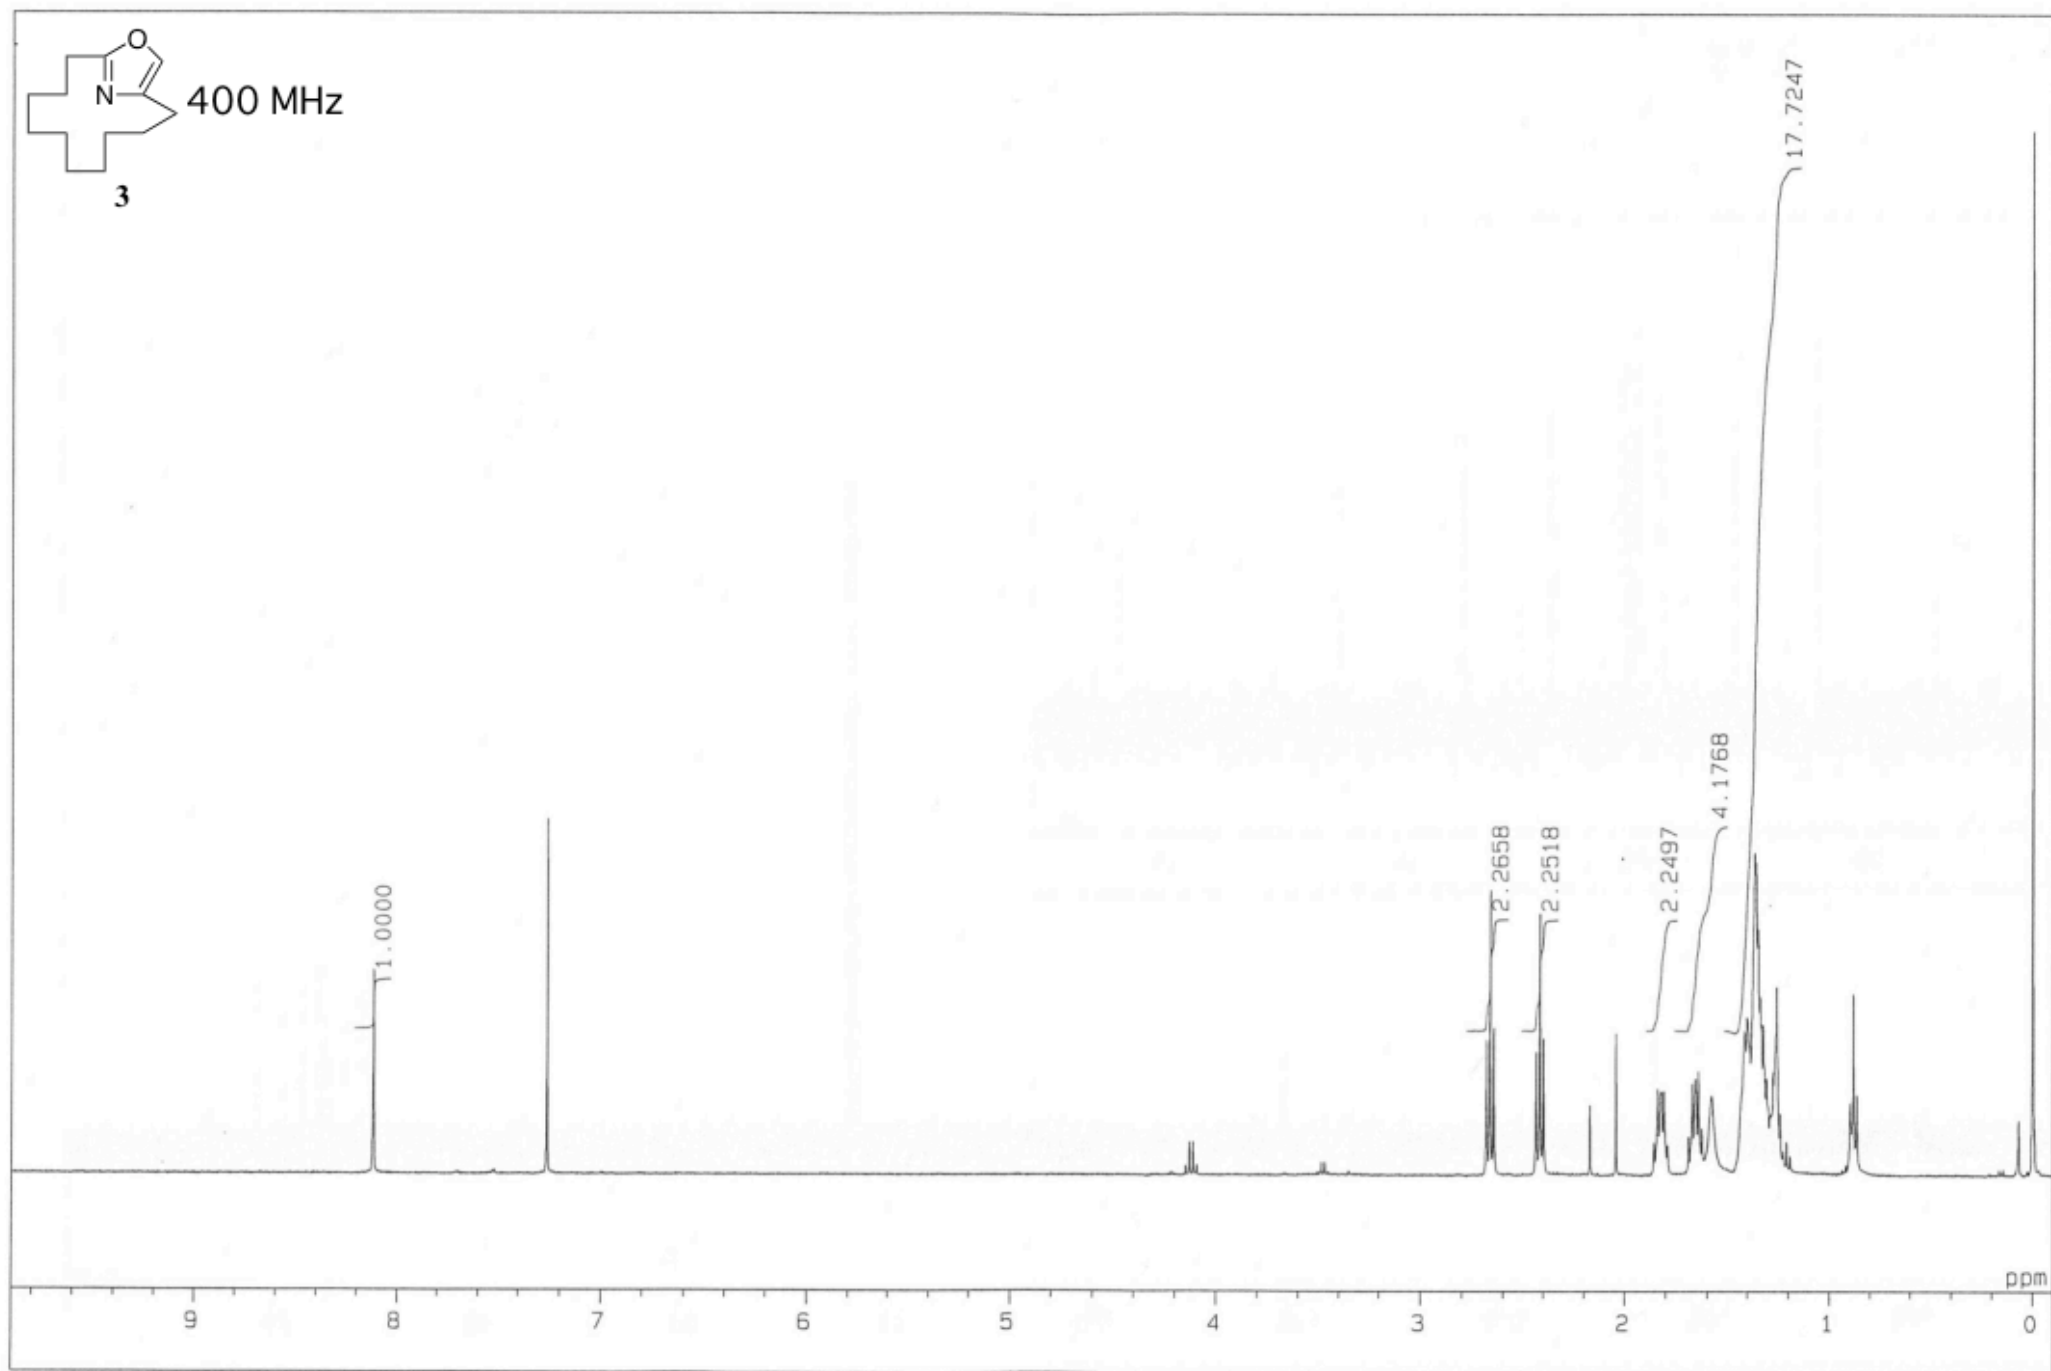

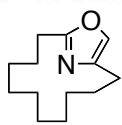

3

67.5 MHz

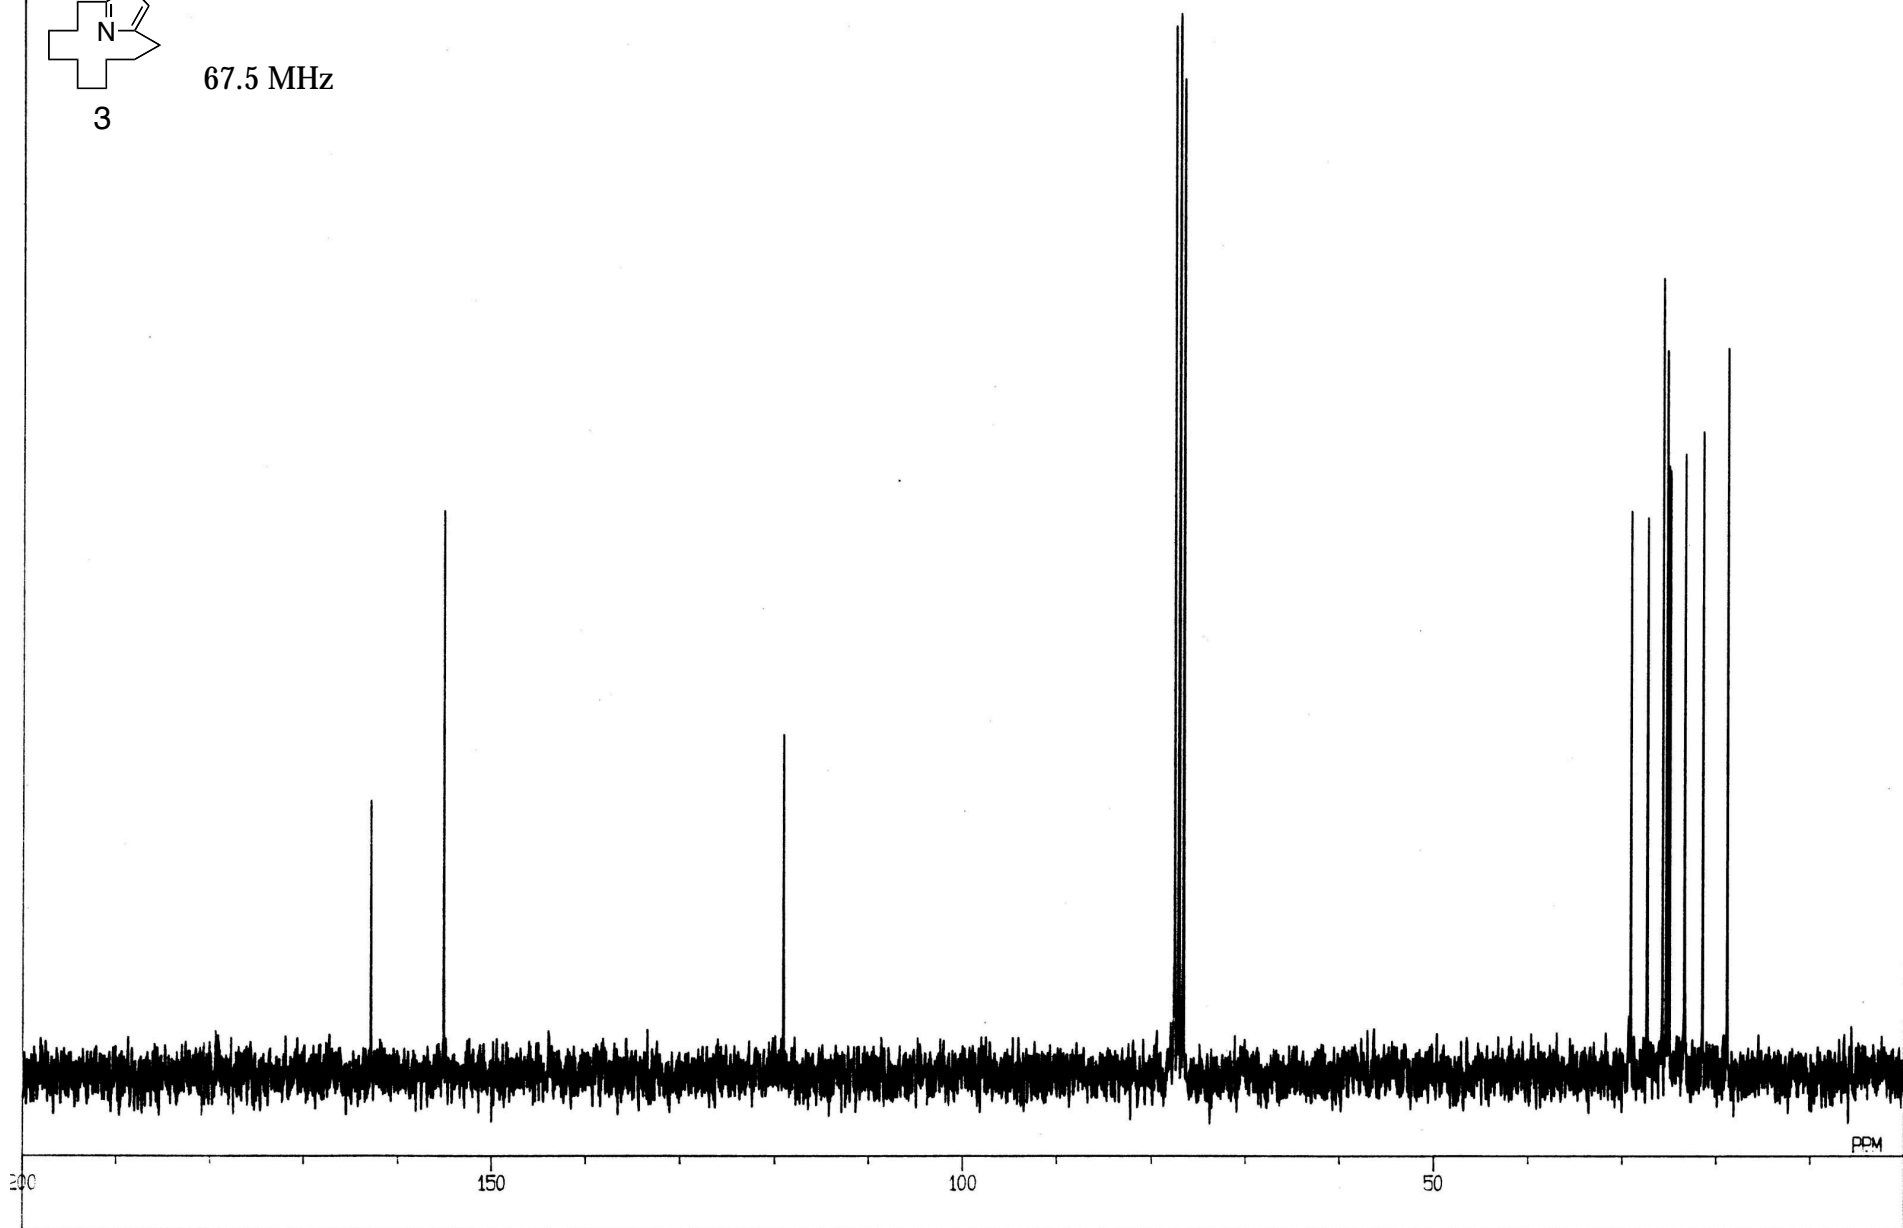

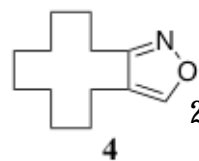

270 MHz

0.758

1.869

2.000

1.837

2.856

11.931

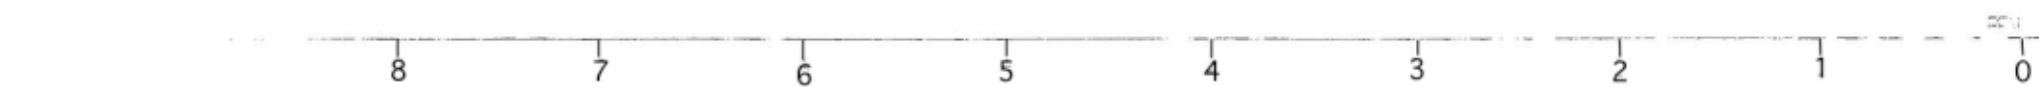

Supplement: b517149k.pdf [file b517149k.pdf]
